# Supplementary material for: Optical properties of aluminum intercalated magnesium nanoparticle square array: a computational study
Source: Royal Society of Chemistry journal article supplement (doi:10.1039/c9cp00867e), 2019-01-01

## **Supplementary Information**

### **Optical Properties of Aluminum Intercalated Magnesium Nanoparticle Square Array: A Computational Study**

Junais Habeeb Mokkath\*

[j.mokath@kcst.edu.kw](mailto:j.mokath@kcst.edu.kw)

Quantum Nanophotonics Simulations Lab, Department of Physics, Kuwait College of Science And  
Technology, Doha Area, 7th Ring Road, P.O. Box 27235, Kuwait.

**Optimized atomic coordinates of single Mg NP**

|    |            |            |            |
|----|------------|------------|------------|
| Mg | 11.6000000 | 10.9237600 | 10.0000000 |
| Mg | 14.8000000 | 10.9237600 | 10.0000000 |
| Mg | 18.0000000 | 10.9237600 | 10.0000000 |
| Mg | 10.0000000 | 13.6950500 | 10.0000000 |
| Mg | 13.2000000 | 13.6950500 | 10.0000000 |
| Mg | 16.4000000 | 13.6950500 | 10.0000000 |
| Mg | 19.6000000 | 13.6950500 | 10.0000000 |
| Mg | 11.6000000 | 16.4663300 | 10.0000000 |
| Mg | 14.8000000 | 16.4663300 | 10.0000000 |
| Mg | 18.0000000 | 16.4663300 | 10.0000000 |
| Mg | 10.0000000 | 19.2376100 | 10.0000000 |
| Mg | 13.2000000 | 19.2376100 | 10.0000000 |
| Mg | 16.4000000 | 19.2376100 | 10.0000000 |
| Mg | 19.6000000 | 19.2376100 | 10.0000000 |
| Mg | 10.0000000 | 10.0000000 | 12.6050000 |
| Mg | 11.6000000 | 10.9237600 | 15.2100000 |
| Mg | 13.2000000 | 10.0000000 | 12.6050000 |
| Mg | 14.8000000 | 10.9237600 | 15.2100000 |
| Mg | 16.4000000 | 10.0000000 | 12.6050000 |
| Mg | 18.0000000 | 10.9237600 | 15.2100000 |
| Mg | 19.6000000 | 10.0000000 | 12.6050000 |
| Mg | 10.0000000 | 13.6950500 | 15.2100000 |
| Mg | 11.6000000 | 12.7712800 | 12.6050000 |
| Mg | 13.2000000 | 13.6950500 | 15.2100000 |
| Mg | 14.8000000 | 12.7712800 | 12.6050000 |
| Mg | 16.4000000 | 13.6950500 | 15.2100000 |
| Mg | 18.0000000 | 12.7712800 | 12.6050000 |
| Mg | 19.6000000 | 13.6950500 | 15.2100000 |
| Mg | 10.0000000 | 15.5425700 | 12.6050000 |
| Mg | 11.6000000 | 16.4663300 | 15.2100000 |
| Mg | 13.2000000 | 15.5425700 | 12.6050000 |
| Mg | 14.8000000 | 16.4663300 | 15.2100000 |
| Mg | 16.4000000 | 15.5425700 | 12.6050000 |
| Mg | 18.0000000 | 16.4663300 | 15.2100000 |
| Mg | 19.6000000 | 15.5425700 | 12.6050000 |
| Mg | 10.0000000 | 19.2376100 | 15.2100000 |
| Mg | 11.6000000 | 18.3138500 | 12.6050000 |

|    |            |            |            |
|----|------------|------------|------------|
| Mg | 13.2000000 | 19.2376100 | 15.2100000 |
| Mg | 14.8000000 | 18.3138500 | 12.6050000 |
| Mg | 16.4000000 | 19.2376100 | 15.2100000 |
| Mg | 18.0000000 | 18.3138500 | 12.6050000 |
| Mg | 19.6000000 | 19.2376100 | 15.2100000 |
| Mg | 10.0000000 | 10.0000000 | 17.8150000 |
| Mg | 11.6000000 | 10.9237600 | 20.4200000 |
| Mg | 13.2000000 | 10.0000000 | 17.8150000 |
| Mg | 14.8000000 | 10.9237600 | 20.4200000 |
| Mg | 16.4000000 | 10.0000000 | 17.8150000 |
| Mg | 18.0000000 | 10.9237600 | 20.4200000 |
| Mg | 19.6000000 | 10.0000000 | 17.8150000 |
| Mg | 10.0000000 | 13.6950500 | 20.4200000 |
| Mg | 11.6000000 | 12.7712800 | 17.8150000 |
| Mg | 13.2000000 | 13.6950500 | 20.4200000 |
| Mg | 14.8000000 | 12.7712800 | 17.8150000 |
| Mg | 16.4000000 | 13.6950500 | 20.4200000 |
| Mg | 18.0000000 | 12.7712800 | 17.8150000 |
| Mg | 19.6000000 | 13.6950500 | 20.4200000 |
| Mg | 10.0000000 | 15.5425700 | 17.8150000 |
| Mg | 11.6000000 | 16.4663300 | 20.4200000 |
| Mg | 13.2000000 | 15.5425700 | 17.8150000 |
| Mg | 14.8000000 | 16.4663300 | 20.4200000 |
| Mg | 16.4000000 | 15.5425700 | 17.8150000 |
| Mg | 18.0000000 | 16.4663300 | 20.4200000 |
| Mg | 19.6000000 | 15.5425700 | 17.8150000 |
| Mg | 10.0000000 | 19.2376100 | 20.4200000 |
| Mg | 11.6000000 | 18.3138500 | 17.8150000 |
| Mg | 13.2000000 | 19.2376100 | 20.4200000 |
| Mg | 14.8000000 | 18.3138500 | 17.8150000 |
| Mg | 16.4000000 | 19.2376100 | 20.4200000 |
| Mg | 18.0000000 | 18.3138500 | 17.8150000 |
| Mg | 19.6000000 | 19.2376100 | 20.4200000 |

Figure S1

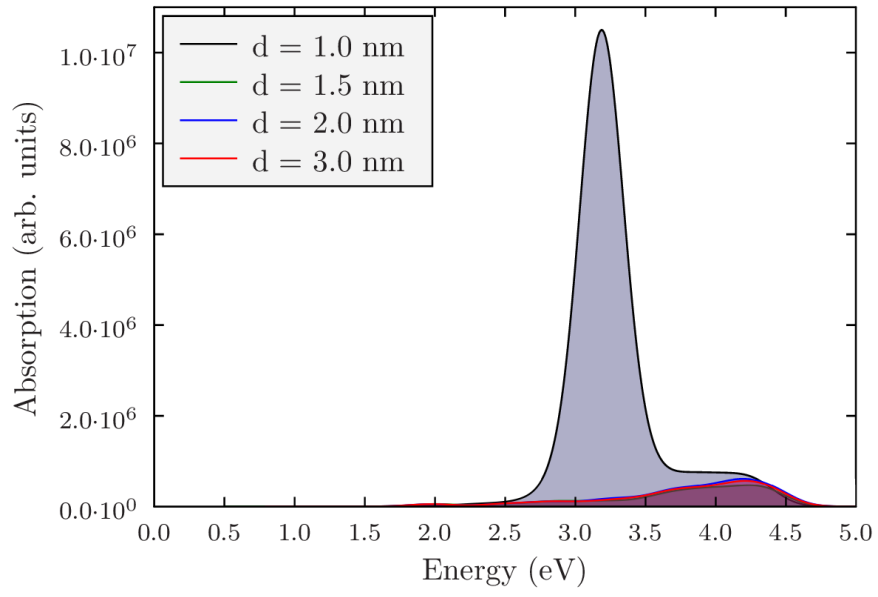

Supplement: c9cp00867e1.pdf [file c9cp00867e1.pdf]
